# Supplementary material
Source: PubMed Central journal article supplement (PMC4727254)
Supplement: NIHMS66407-supplement-Supplementary_Table_1.pdf [file NIHMS66407-supplement-Supplementary_Table_1.pdf]

Table 1.1: Characteristics of excluded children

|                       |                             | All         | 2010        | 2011        | 2012        |
|-----------------------|-----------------------------|-------------|-------------|-------------|-------------|
| N                     |                             | 1078        | 368         | 559         | 151         |
| Age (years)           | Age missing                 | 13          | 8           | 5           | 0           |
|                       | 4-4.5                       | 44 ( 4.1%)  | 21 (5.8%)   | 22 (4.0%)   | 1 (0.7%)    |
|                       | 4.5-5                       | 479 (45.0%) | 167 (46.4%) | 252 (45.5%) | 60 (39.7%)  |
|                       | 5-5.5                       | 488 (45.8%) | 157 (43.6%) | 250 (45.1%) | 81 (53.6%)  |
|                       | >5.5                        | 54 ( 5.1%)  | 15 (4.2%)   | 30 (5.4%)   | 9 (6.0%)    |
| Gender                | Gender missing              | 333         | 10          | 323         | 0           |
|                       | F                           | 378 (50.7%) | 190 (53.1%) | 108 (45.8%) | 80 (53.0%)  |
|                       | M                           | 367 (49.3%) | 168 (46.9%) | 128 (54.2%) | 71 (47.0%)  |
| Glasgow SIMD quintile | SIMD missing                | 931         | 361         | 419         | 151         |
|                       | 5 (least deprived)          | 55 (37.4%)  | 0 ( 0.0%)   | 55 (39.3%)  | 0 (-)       |
|                       | 4                           | 25 (17.0%)  | 2 (28.6%)   | 23 (16.4%)  | 0 (-)       |
|                       | 3                           | 29 (19.7%)  | 3 (42.9%)   | 26 (18.6%)  | 0 (-)       |
|                       | 2                           | 22 (15.0%)  | 0 ( 0.0%)   | 22 (15.7%)  | 0 (-)       |
|                       | 1 (most deprived)           | 16 (10.9%)  | 2 (28.6%)   | 14 (10.0%)  | 0 (-)       |
| Ethnicity             | Ethnicity missing           | 751         | 273         | 441         | 37          |
|                       | White-UK                    | 236 (72.2%) | 79 (83.2%)  | 85 (72.0%)  | 72 (63.2%)  |
|                       | Other                       | 91 (27.8%)  | 16 (16.8%)  | 33 (28.0%)  | 42 (36.8%)  |
| Looked after status   | Looked after status missing | 393         | 0           | 393         | 0           |
|                       | Looked after in care        | 25 ( 3.6%)  | 14 (3.8%)   | 3 (1.8%)    | 8 (5.3%)    |
|                       | Not looked after in care    | 660 (96.4%) | 354 (96.2%) | 163 (98.2%) | 143 (94.7%) |
