# Supplementary material
Source: PubMed Central journal article supplement (PMC4727254)
Supplement: NIHMS66407-supplement-Supplementary_Table_2.pdf [file NIHMS66407-supplement-Supplementary_Table_2.pdf]

**Supplementary Web Table: Ward demographics, for all 3 years considered together.**

‘Locality weighting’ is a standardised score representing the overall demographic distribution for the ward (dependent on age, gender, deprivation and under statutory parental supervision). The mean score is 0, while a negative score represents fewer ‘bad’ characteristics than average, and a positive score represents more ‘bad’ characteristics than average. ‘High deprivation’ represents the percentage of datazones in the ward that are in the most deprived two Glasgow SIMD quintiles (i.e. should be 40% on average) and ‘outside normal age range’ is defined as <4.5 or >5.5 years

| Ward                     | Boys  | Outside<br>normal age<br>range | High<br>deprivation | Under<br>statutory<br>parental<br>supervision | Locality<br>weighting |
|--------------------------|-------|--------------------------------|---------------------|-----------------------------------------------|-----------------------|
| Anderston/City           | 51.3% | 7.4%                           | 29.5%               | 0.8%                                          | -0.8                  |
| Baillieston              | 50.2% | 6.2%                           | 49.4%               | 2.8%                                          | 0.0                   |
| Calton                   | 55.6% | 5.0%                           | 87.7%               | 3.0%                                          | 1.8                   |
| Canal                    | 52.0% | 8.7%                           | 86.8%               | 2.0%                                          | 1.7                   |
| Craigton                 | 47.4% | 9.1%                           | 29.4%               | 3.6%                                          | -0.8                  |
| Drumchapel/Annie'sland   | 51.4% | 7.0%                           | 61.9%               | 2.4%                                          | 0.6                   |
| East Centre              | 54.0% | 6.3%                           | 65.1%               | 2.5%                                          | 0.8                   |
| Garscadden/Scotstounhill | 52.4% | 8.7%                           | 43.1%               | 1.8%                                          | -0.1                  |

| Ward              | Boys  | Outside<br>normal age<br>range | High<br>deprivation | Under<br>statutory<br>parental<br>supervision | Locality<br>weighting |
|-------------------|-------|--------------------------------|---------------------|-----------------------------------------------|-----------------------|
| Govan             | 53.5% | 5.9%                           | 51.2%               | 2.2%                                          | 0.2                   |
| Greater Pollok    | 51.9% | 6.1%                           | 49.5%               | 2.8%                                          | 0.1                   |
| Hillhead          | 49.3% | 12.8%                          | 16.8%               | 2.5%                                          | -1.1                  |
| Langside          | 50.7% | 8.5%                           | 0.0%                | 1.8%                                          | -2.0                  |
| Linn              | 52.6% | 7.3%                           | 51.2%               | 2.5%                                          | 0.2                   |
| Maryhill/Kelvin   | 51.3% | 10.0%                          | 48.0%               | 2.0%                                          | 0.1                   |
| Newlands/Auldburn | 49.4% | 9.4%                           | 38.0%               | 2.1%                                          | -0.4                  |
| North East        | 50.3% | 5.3%                           | 73.9%               | 2.1%                                          | 1.0                   |
| Partick West      | 50.1% | 7.8%                           | 18.5%               | 0.8%                                          | -1.3                  |
| Pollokshields     | 52.1% | 8.9%                           | 14.1%               | 1.4%                                          | -1.4                  |
| Shettleston       | 57.2% | 6.0%                           | 49.7%               | 2.7%                                          | 0.3                   |

---

| Ward              | Boys  | Outside<br>normal age<br>range | High<br>deprivation | Under<br>statutory<br>parental<br>supervision | Locality<br>weighting |
|-------------------|-------|--------------------------------|---------------------|-----------------------------------------------|-----------------------|
| Southside Central | 55.4% | 7.4%                           | 46.2%               | 3.2%                                          | 0.2                   |
| Springburn        | 56.4% | 4.5%                           | 68.5%               | 2.0%                                          | 1.0                   |
| p-value           | 0.32  | <0.01                          | <0.01               | 0.50                                          | -                     |

---
