# Supplementary material
Source: PubMed Central journal article supplement (PMC4727254)

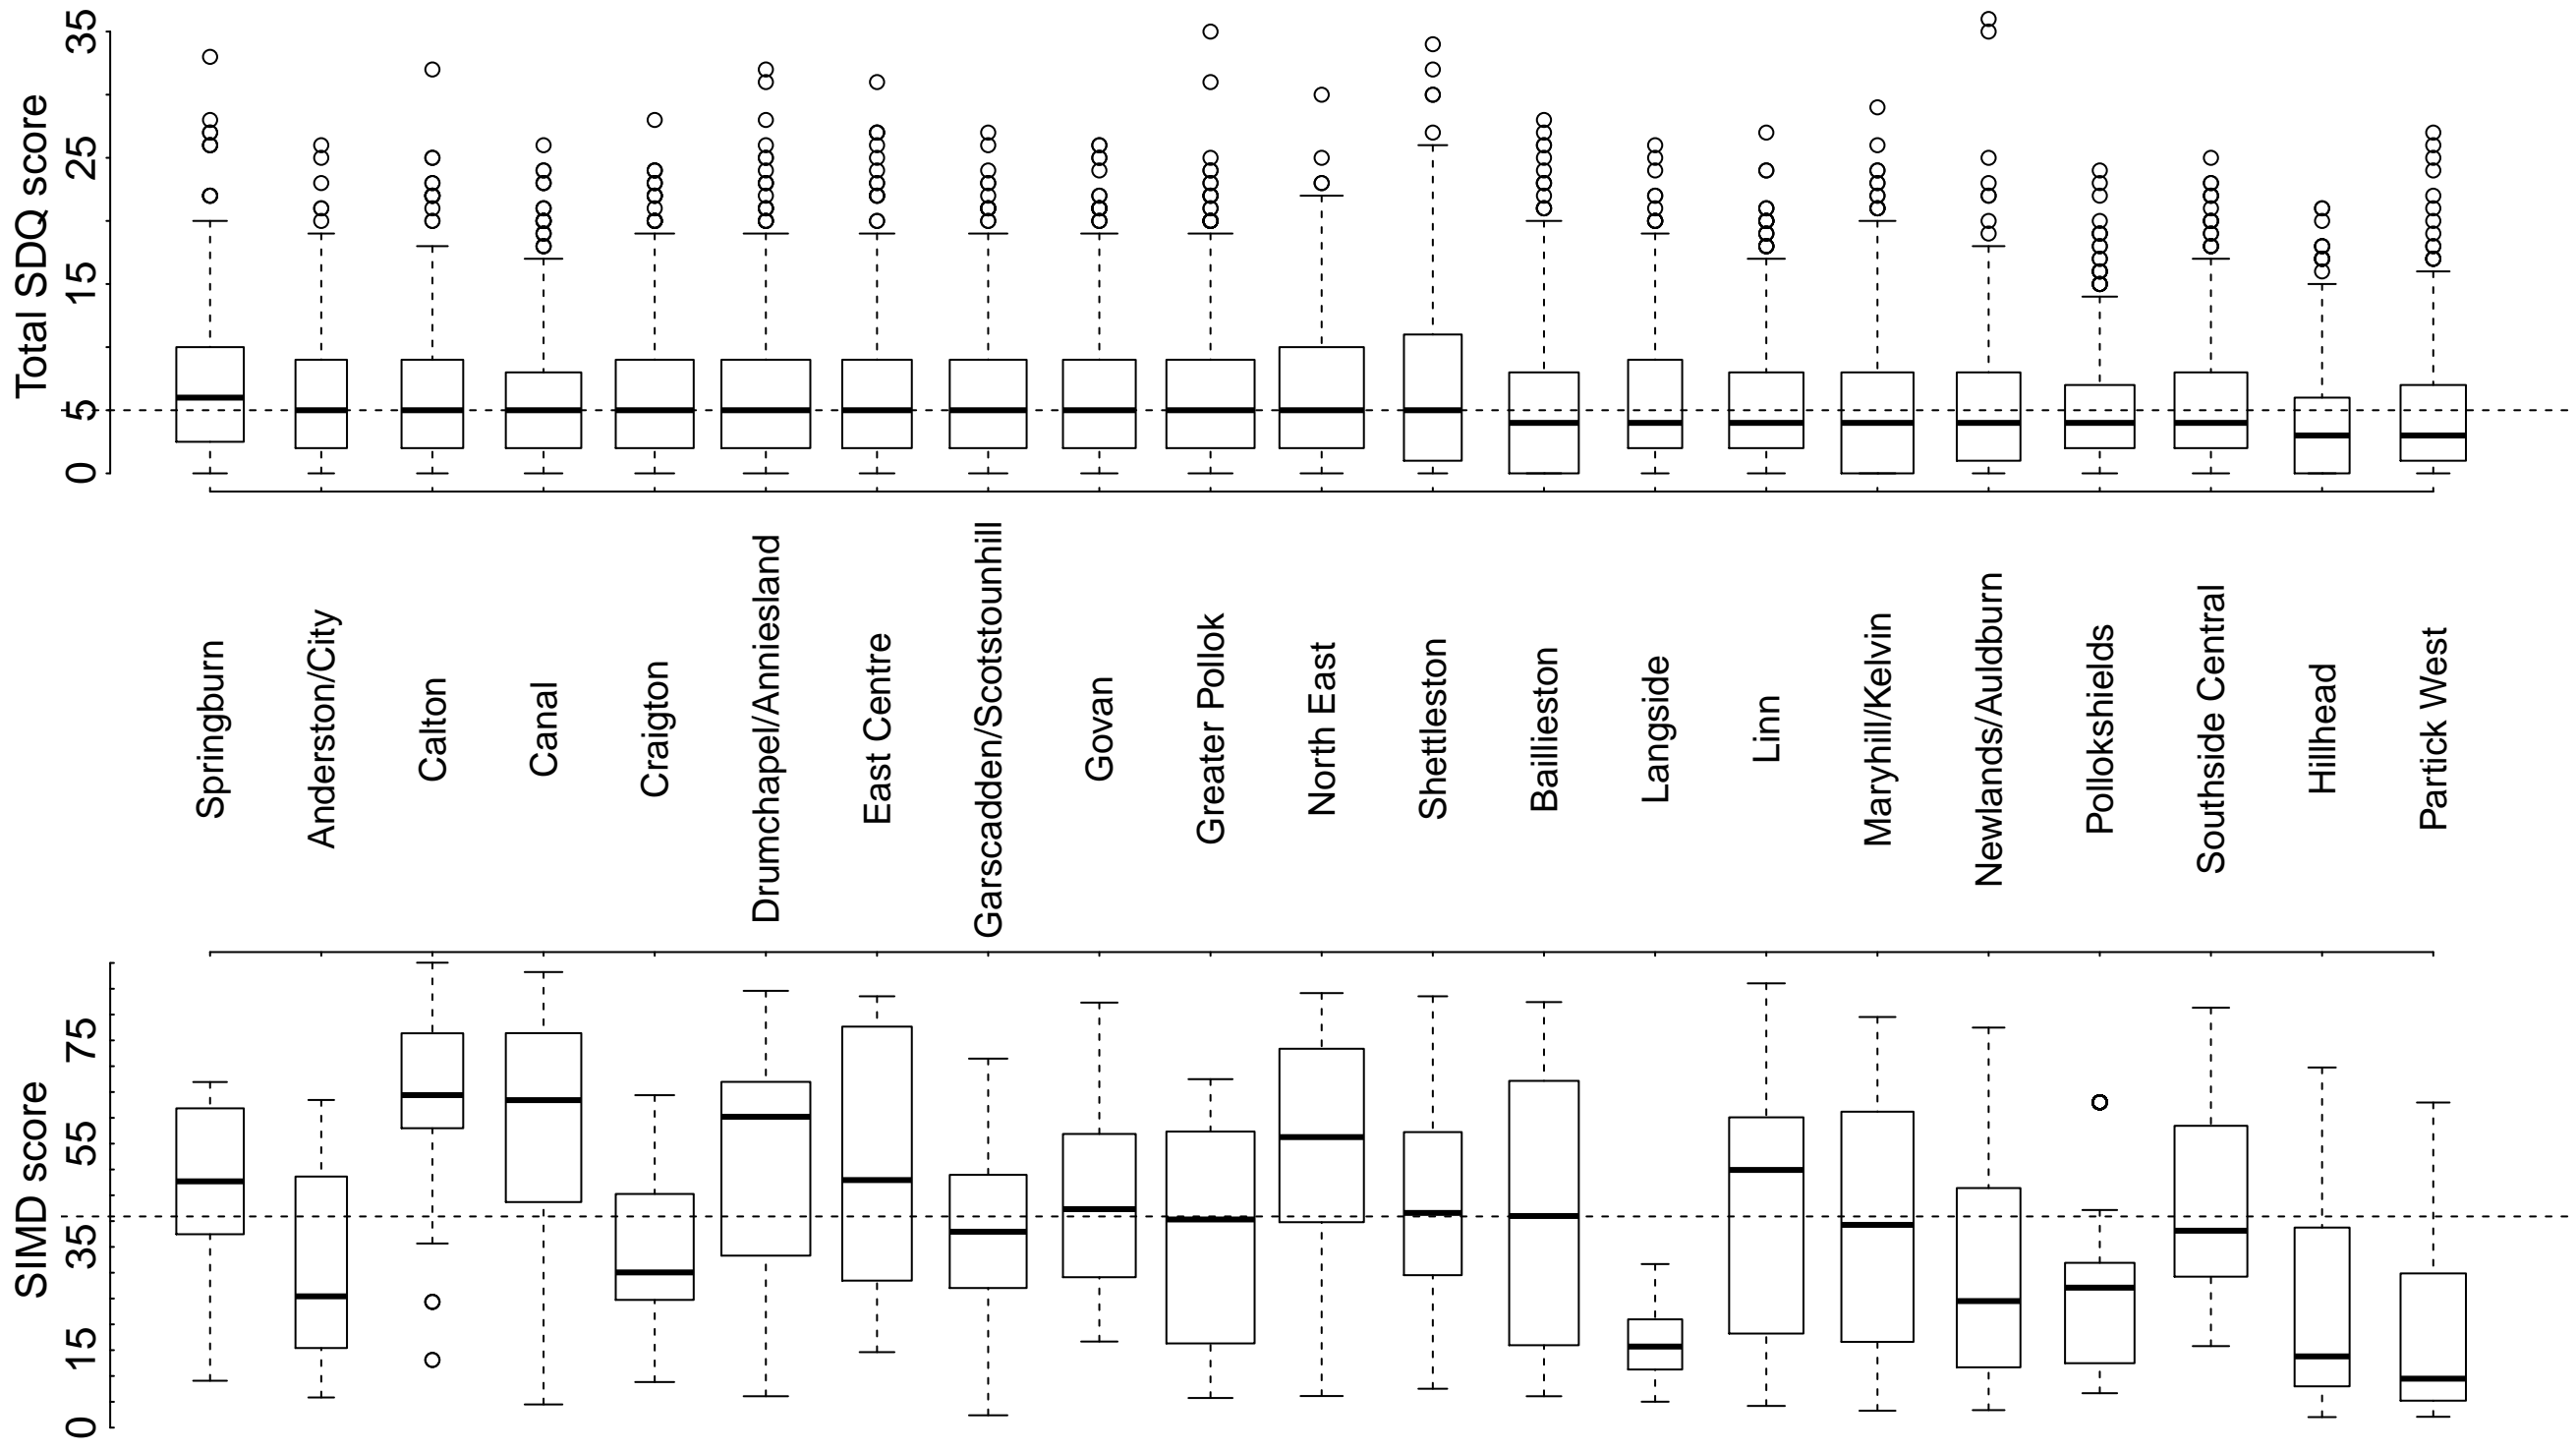

Supplement: NIHMS66407-supplement-Supplementary_Figure_A.pdf [file NIHMS66407-supplement-Supplementary_Figure_A.pdf]

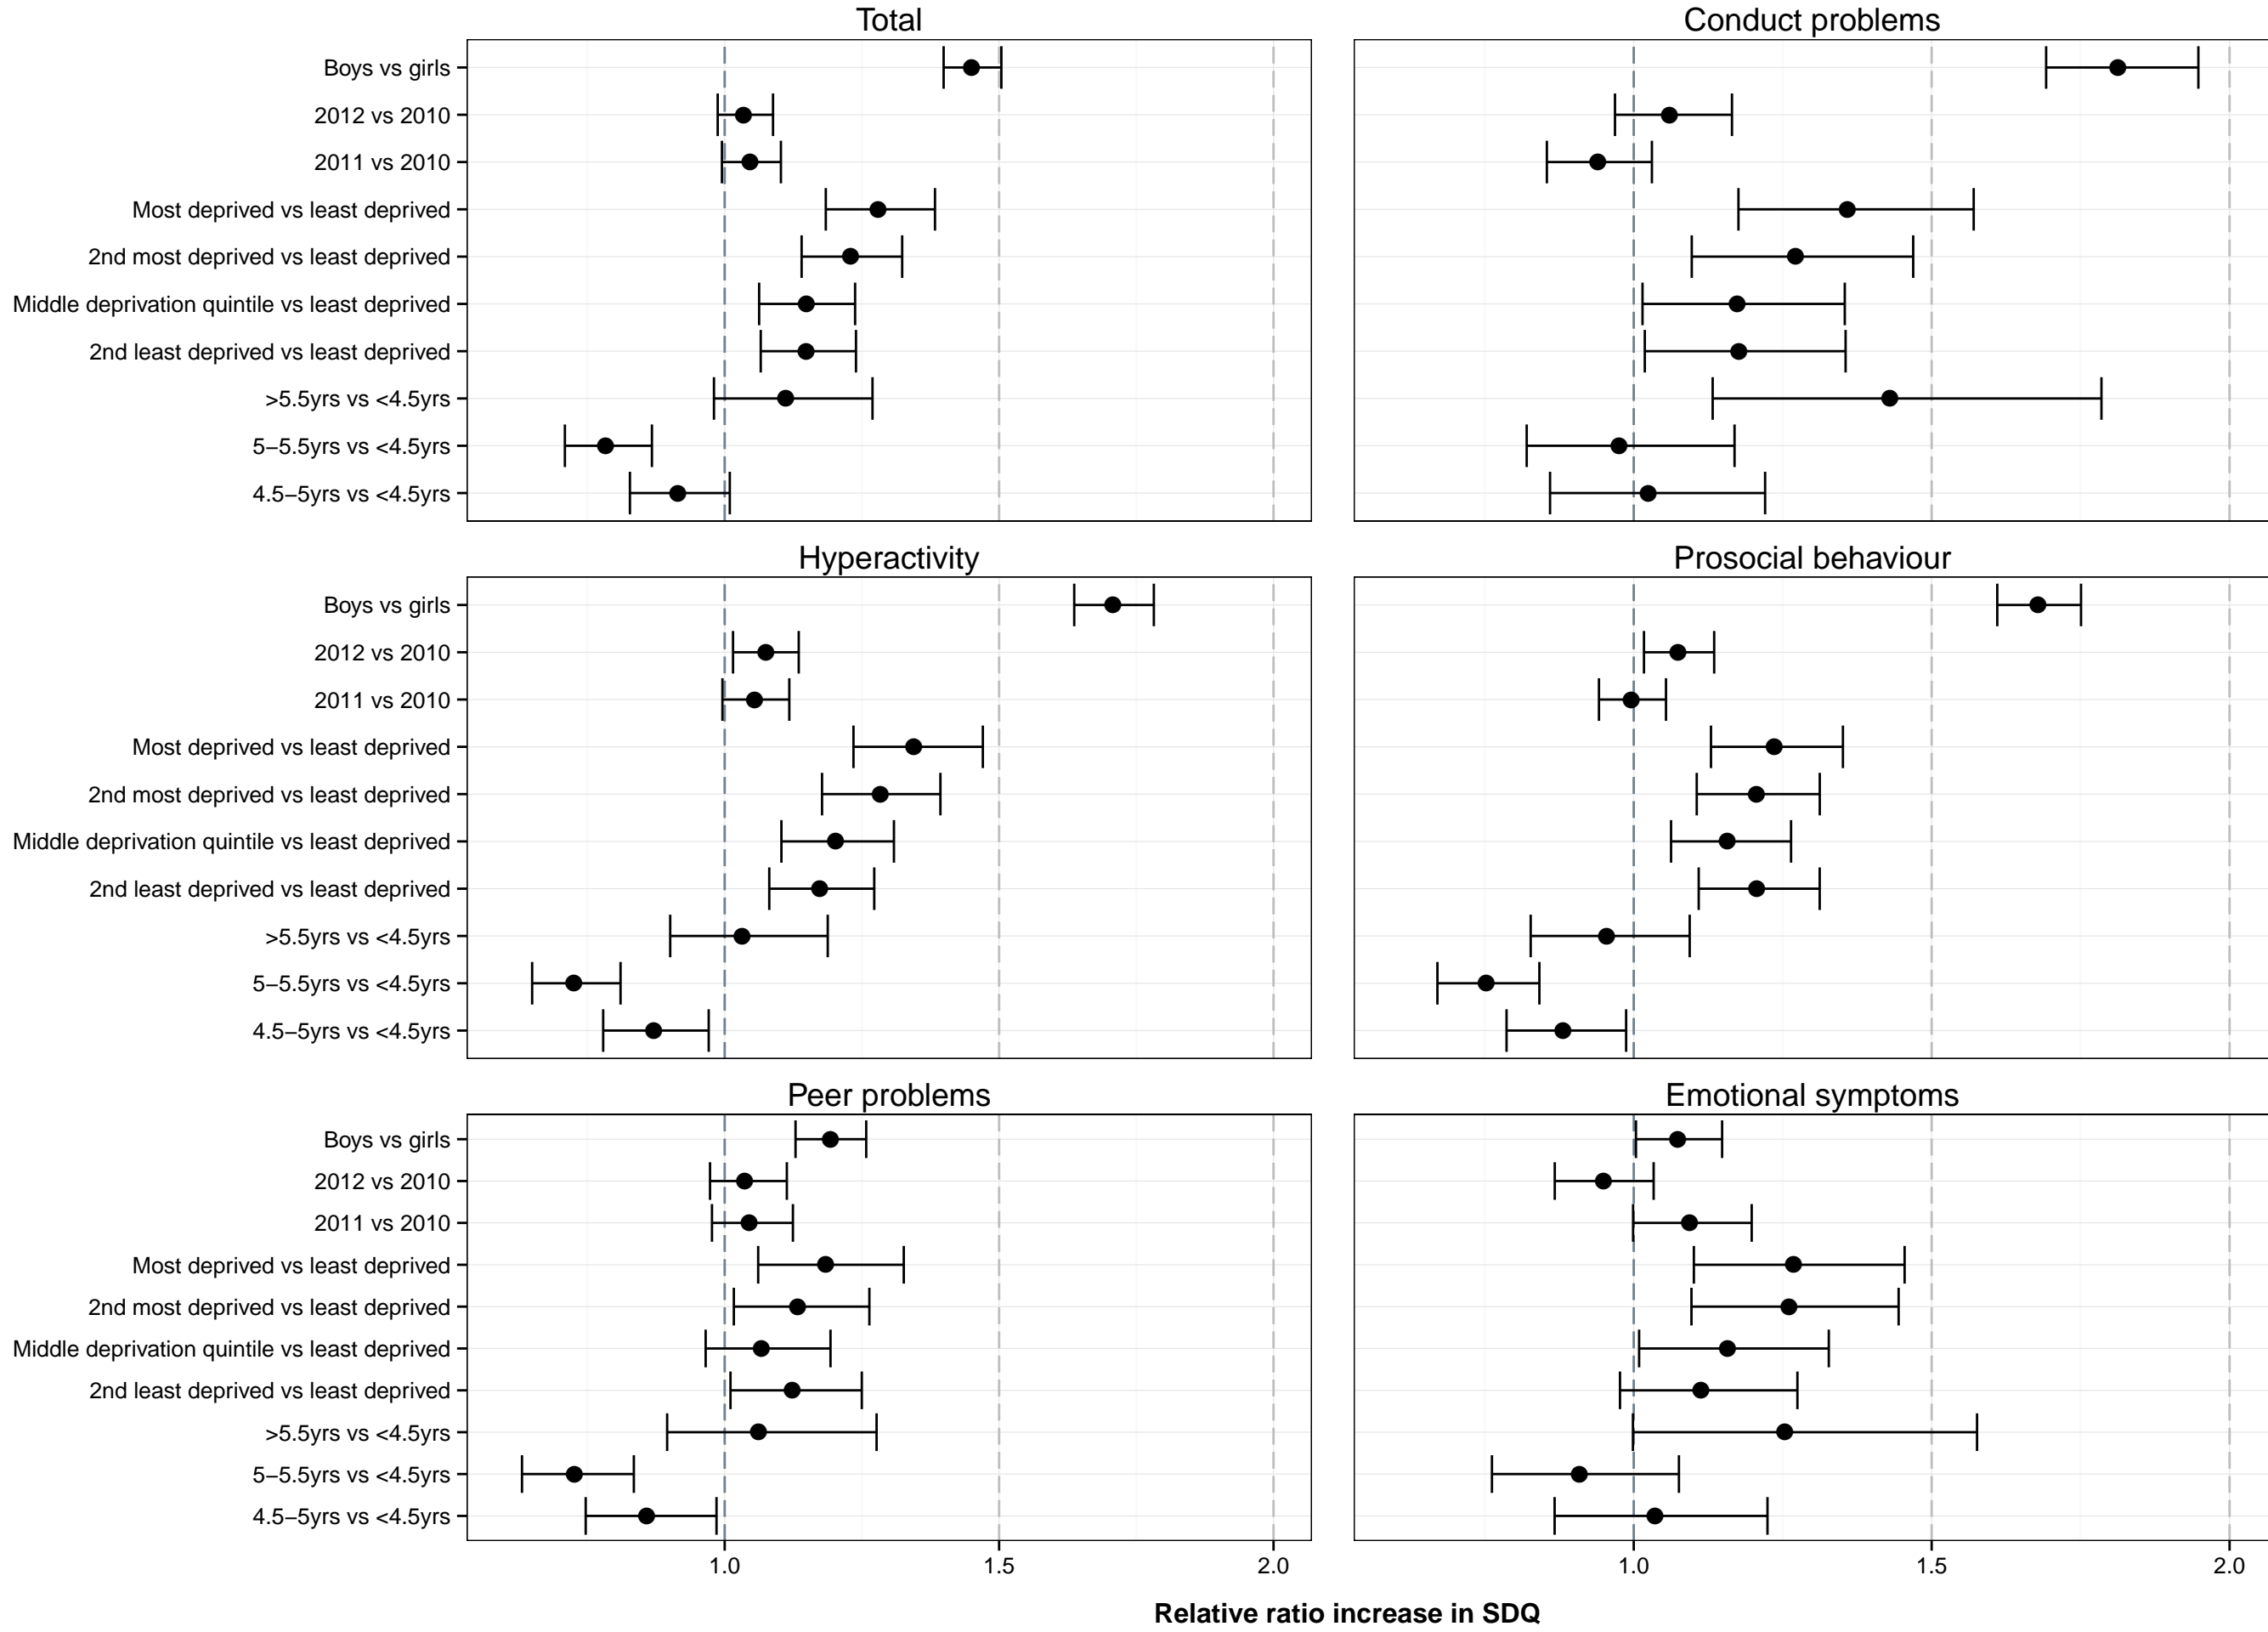

Supplement: NIHMS66407-supplement-Supplementary_Figure_B.pdf [file NIHMS66407-supplement-Supplementary_Figure_B.pdf]
